# Supplementary material for: Enhanced light harvesting in flexible polymer solar cells: synergistic simulation of a plasmonic meta-mirror and a transparent silver mesowire electrode
Source: Royal Society of Chemistry journal article supplement (doi:10.1039/c6ta08119c), 2016-01-01
Supplement: c6ta08119c1.pdf [file c6ta08119c1.pdf]

## Supporting Information

### **Enhanced Light Harvesting in Flexible Polymer Solar Cells: Synergistic Stimulation of Plasmonic Meta-Mirror and Transparent Silver Mesowire Electrode**

Qing-Dong Ou,<sup>a,b,†</sup> Hao-Jun Xie,<sup>a,†</sup> Jing-De Chen,<sup>a</sup> Lei Zhou,<sup>c</sup> Yan-Qing Li,<sup>a,\*</sup> Jian-Xin Tang<sup>a,\*</sup>

<sup>a</sup> Institute of Functional Nano & Soft Materials (FUNSOM), Jiangsu Key Laboratory for Carbon-Based Functional Materials & Devices, Soochow University, Suzhou 215123, China

<sup>b</sup> Department of Materials Science and Engineering, Monash University, Clayton, Victoria 3800, Australia

<sup>c</sup> Faculty of Mathematics and Physics, Huaiyin Institute of Technology, Huai'an 223003, PR China

<sup>†</sup> These authors contributed equally to this work.

\* Corresponding authors. E-mail addresses: [jxtang@suda.edu.cn](mailto:jxtang@suda.edu.cn) (J.X. Tang) ;

[yqli@suda.edu.cn](mailto:yqli@suda.edu.cn) (Y.Q. Li)

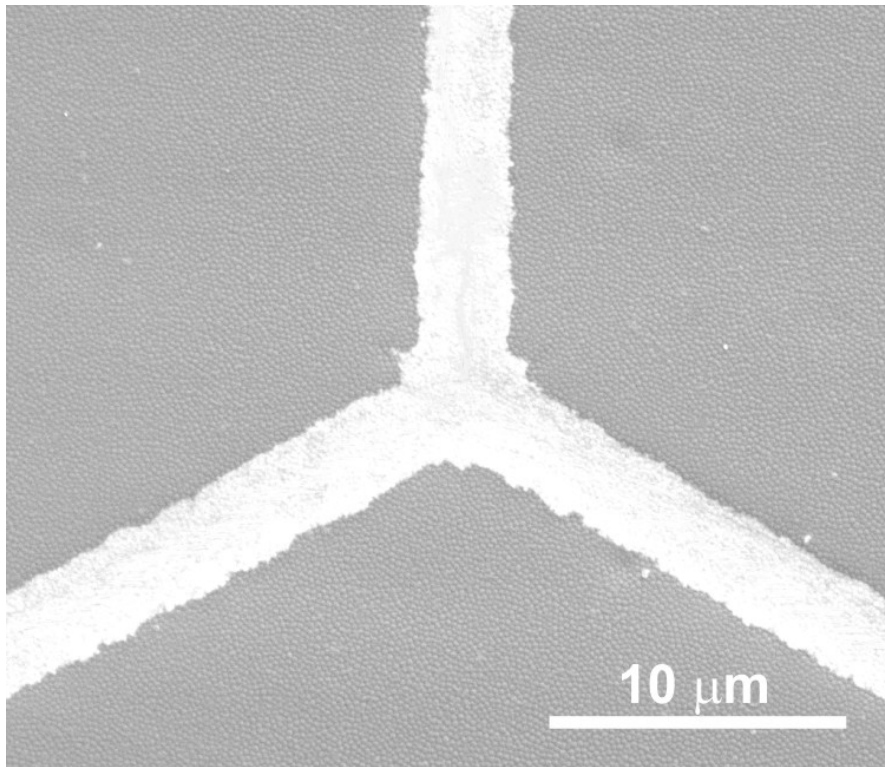

**Figure S1.** SEM image of the nanostructured photoactive layer fabricated onto Ag mesowire grid substrate.

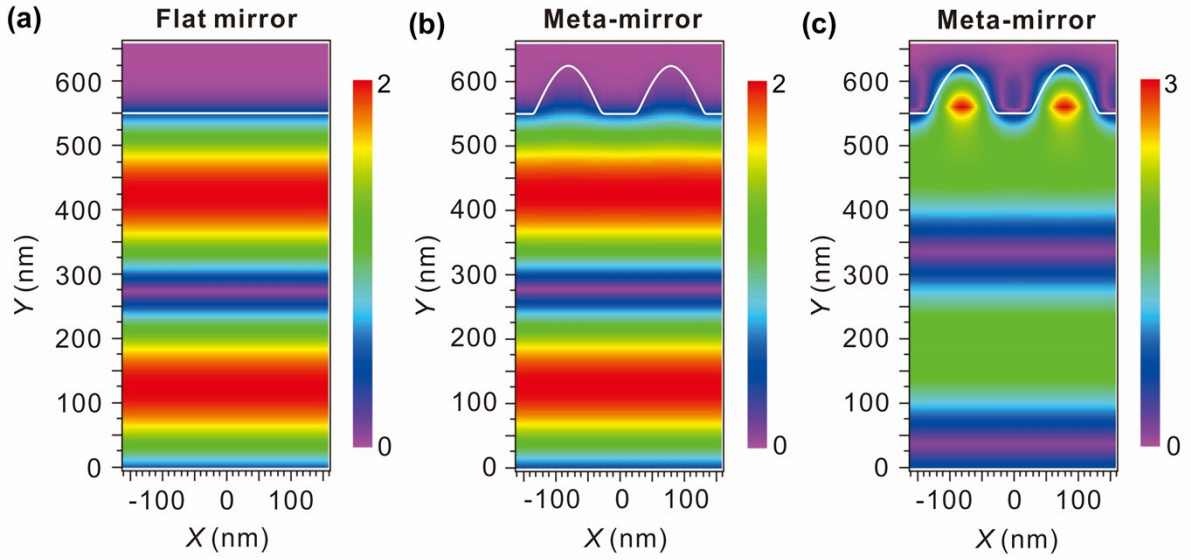

**Figure S2.** Optical properties of a meta-mirror. Simulated electric field amplitude distributions for 600 nm-wavelength light reflecting from a) flat aluminum mirror and patterned aluminum metal-mirror under TE (b) and TM (c) illumination. TM illumination shows the maximum electric field intensity at the top of the grooves and manifests the magnetic mirror behavior.

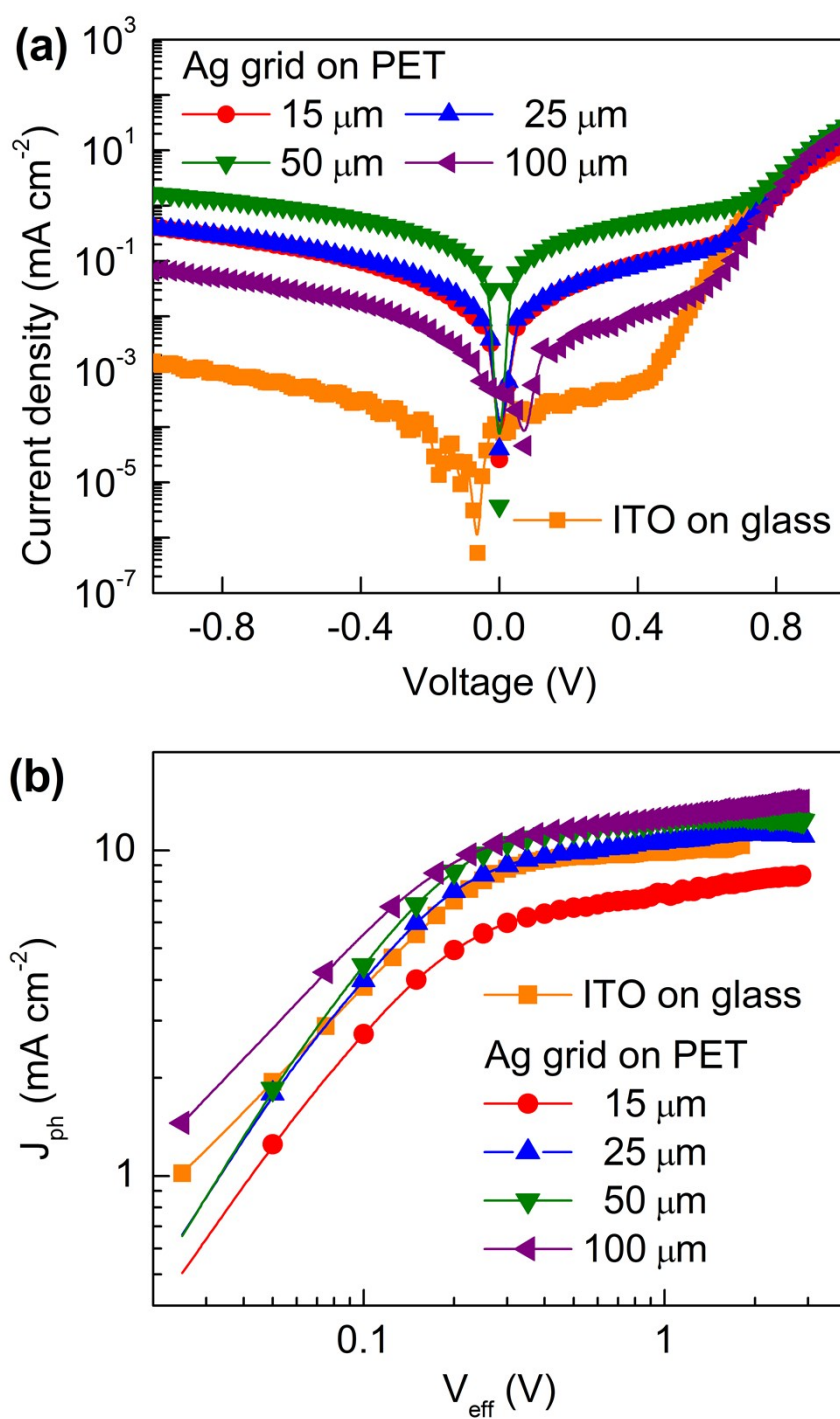

**Figure S3.** The dark current density-voltage characteristics (a) and the photocurrent density ( $J_{\text{ph}}$ ) as a function of the effective voltage ( $V_{\text{eff}}$ ) (b) of flexible polymer solar cells with a flat architecture on transparent Ag mesowire grid electrode.

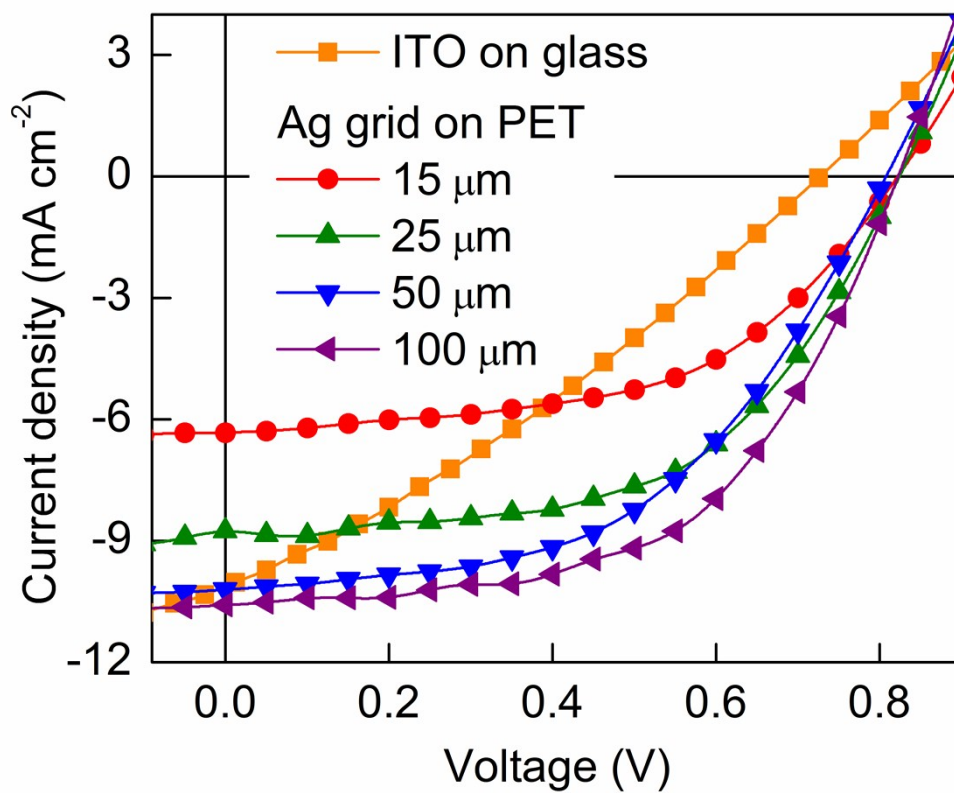

**Figure S4.** Current density versus voltage characteristics of flexible polymer solar cells with a large active area (1.44 cm<sup>2</sup>) on transparent Ag mesowire grid electrode.

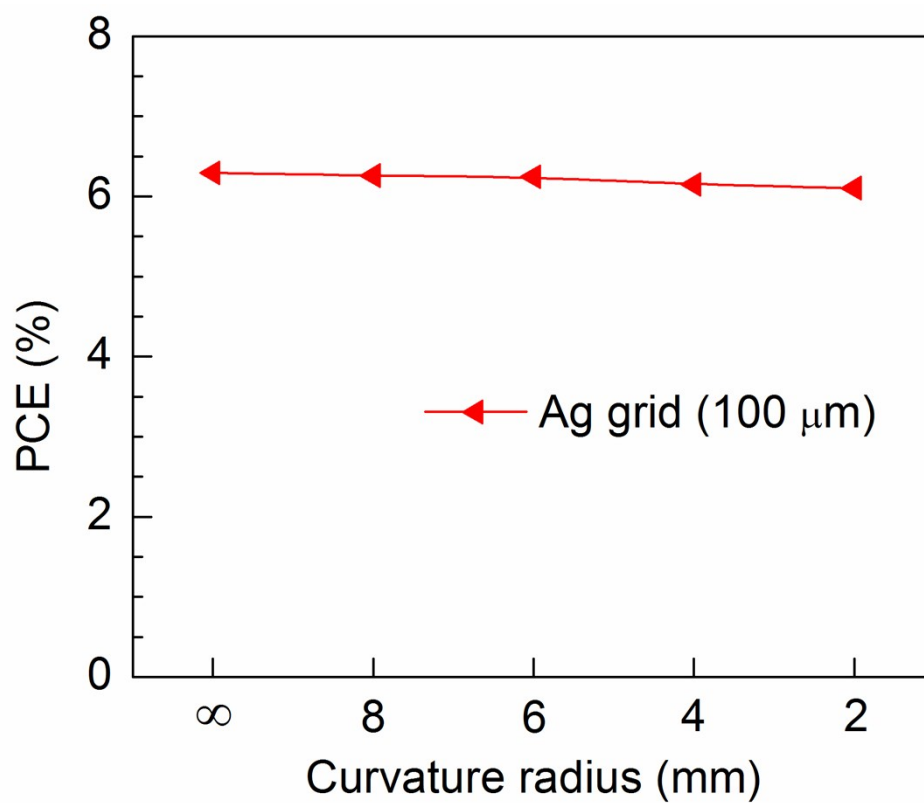

**Figure S5.** PCEs measured after bending flexible PSCs based on the Ag mesowire grid electrode within several radius of  $\infty$ , 8, 6, 4 and 2 mm.

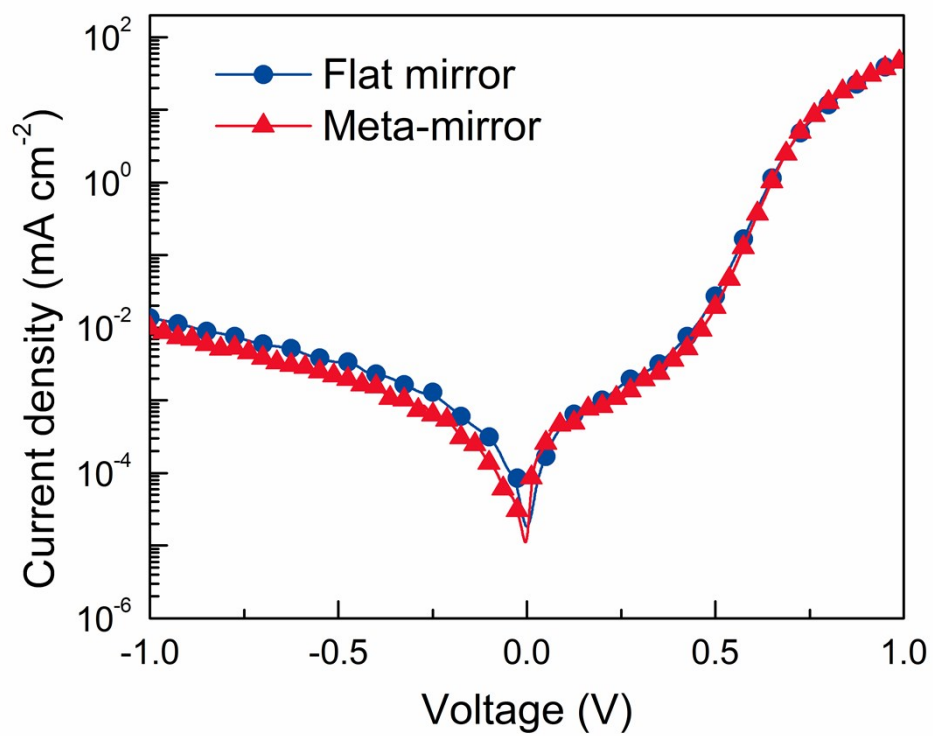

**Figure S6.** The dark current density-voltage characteristics of flexible polymer solar cells with flat mirror and meta-mirror, respectively.

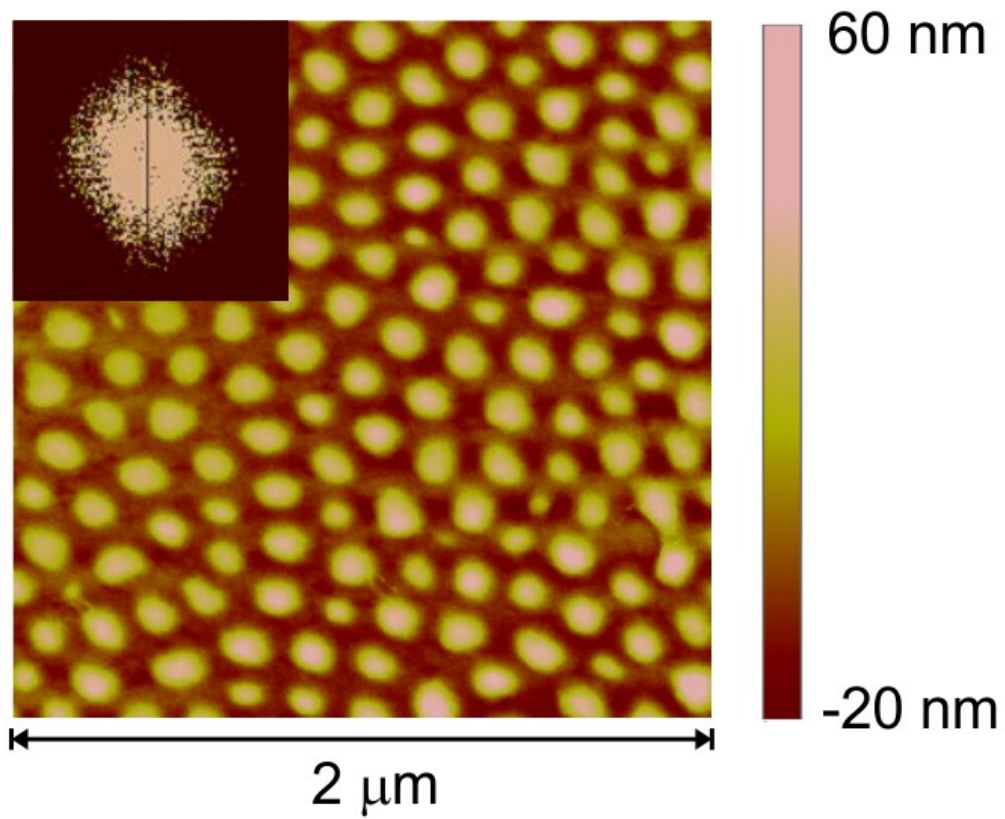

**Figure S7.** AFM image and fast Fourier transform (FFT) pattern of subwavelength features arranged in quasi-random pattern. Fourier energy concentrated into a close-to-circular region implies the capacities of broadband coupling and quasi-Lambertian scattering.



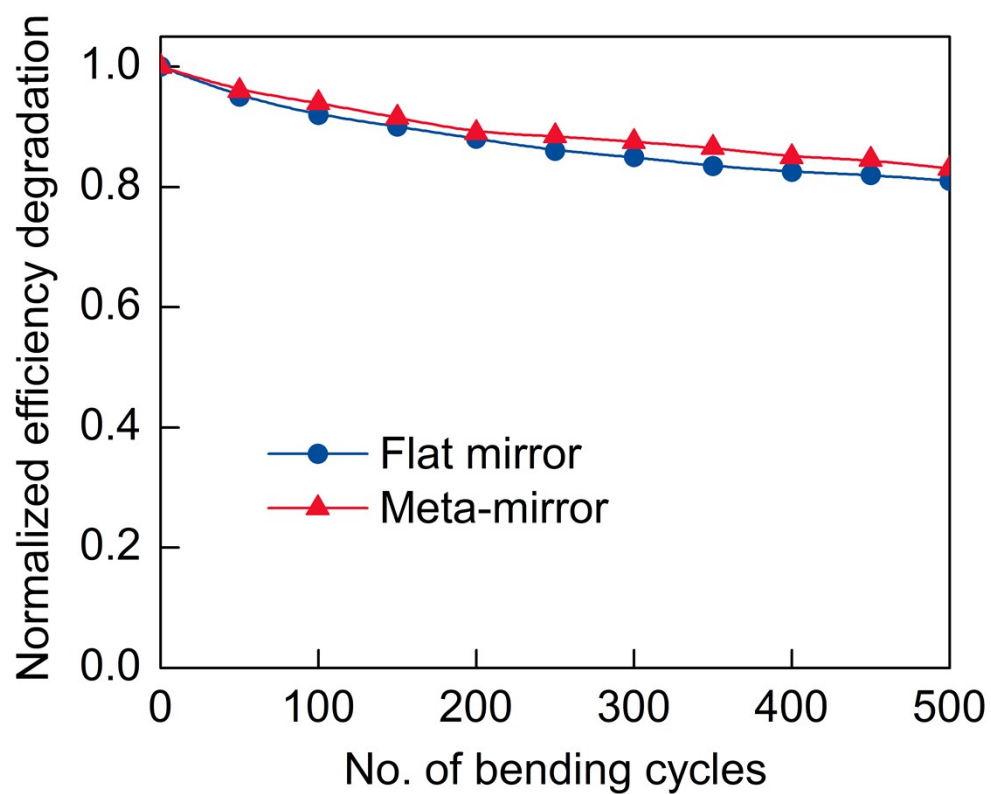

**Figure S8.** Performance stability during the bending tests. The evolution of normalized power conversion efficiency of flexible polymer solar cells as a function of the bending cycles in the same ambient conditions by repeatedly bending the substrate to a radius of 5 mm.
